# Supplementary material for: Mechanistic insight into a peptide hormone signaling complex mediating floral organ abscission
Source: eLife journal article supplement (doi:10.7554/elife.15075), 2016-04-08
Supplement: supp [file elife-15075-supp-v1.zip]

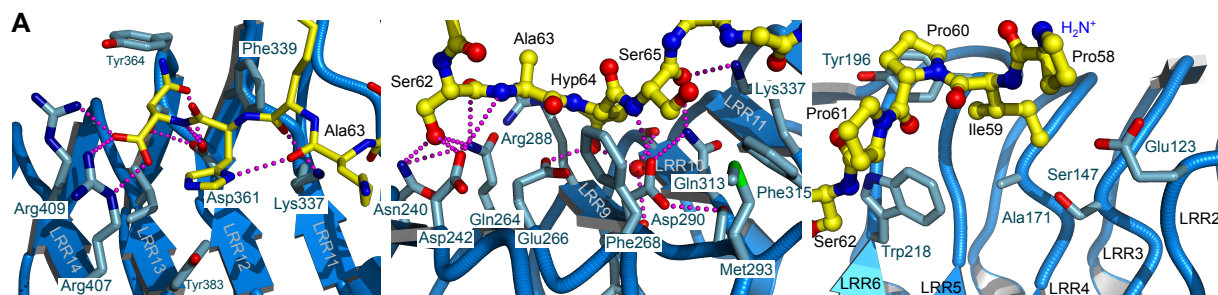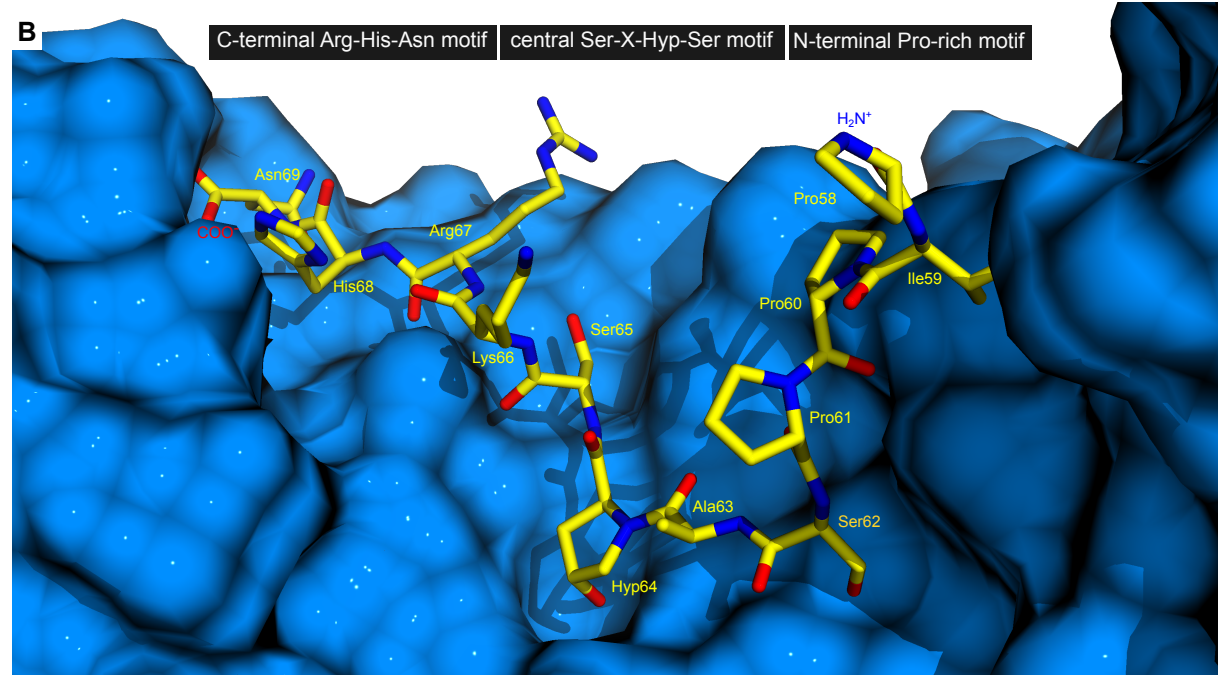

**C**

consensus: **LxxLxxLxLxxNxLSGxIPxxxLGxx**

|     |     |                                               |     |
|-----|-----|-----------------------------------------------|-----|
| 1.  | 88  | LPSLHSLSLYNNNSINGSLSADDFDT-                   | 112 |
| 2.  | 113 | CHNLISLDLS <b>E</b> NLLVGSIPKS-LPFN           | 137 |
| 3.  | 138 | LPNLKFLEI <b>S</b> GNNLSDTIPSS-FGE-           | 161 |
| 4.  | 162 | FRKLESNL <b>A</b> GNFLSGTIPAS-LGN-            | 167 |
| 5.  | 186 | VTTLKELKL <b>A</b> YNLFSPSQIPSQLGN-           | 210 |
| 6.  | 211 | LTELQVL <b>W</b> LAGCNLVGPIPPS-LSR-           | 234 |
| 7.  | 235 | LTSLV <b>N</b> LDLTFNQLTGSIPSW-ITQ-           | 258 |
| 8.  | 259 | LKTVE <b>Q</b> IEL <b>F</b> NNSFSGELPES-MGN-  | 282 |
| 9.  | 283 | MTTLK <b>R</b> FD <b>A</b> SMNKLTKIPDN-LN--   | 305 |
| 10. | 306 | LLNLE <b>S</b> L <b>N</b> LFENMLEGPLPES-ITR-  | 329 |
| 11. | 330 | SKTLSEL <b>K</b> L <b>F</b> NNRLTGVLPSQ-LGA-  | 353 |
| 12. | 354 | NSPLQY <b>V</b> DL <b>S</b> YNRFSGEIPANVCG--  | 377 |
| 13. | 378 | EGKLEY <b>L</b> IL <b>I</b> DNFSFGESISNN-LGK- | 401 |
| 14. | 402 | CKSL <b>T</b> R <b>V</b> RLSNNKLSGQIPHGFWG--  | 425 |
| 15. | 426 | LPRLSLLLESDNSFTGSIPTKIIG--                    | 449 |
| 16. | 450 | AKNLSNLRISKNRFSGSIPNE-IGS-                    | 473 |
| 17. | 474 | LNGTIEISGAENDFSGEIPES-LVK-                    | 497 |
| 18. | 498 | LKQLSRLDLSKNQLSGEIPRE-LRG-                    | 521 |
| 19. | 522 | WKNLNELNLANHLSGEIPKE-VGI-                     | 545 |
| 20. | 546 | LPVLNYLDLSSNQFSGEIPLE-LQN-                    | 569 |
| 21. | 570 | LK  LNVNLNLSYNHLSGKIPL- <b>Y</b> A--          | 591 |
