# Supplementary figures and images for: Mechanistic insight into a peptide hormone signaling complex mediating floral organ abscission
Source: eLife journal article supplement (doi:10.7554/elife.15075), 2016-04-08

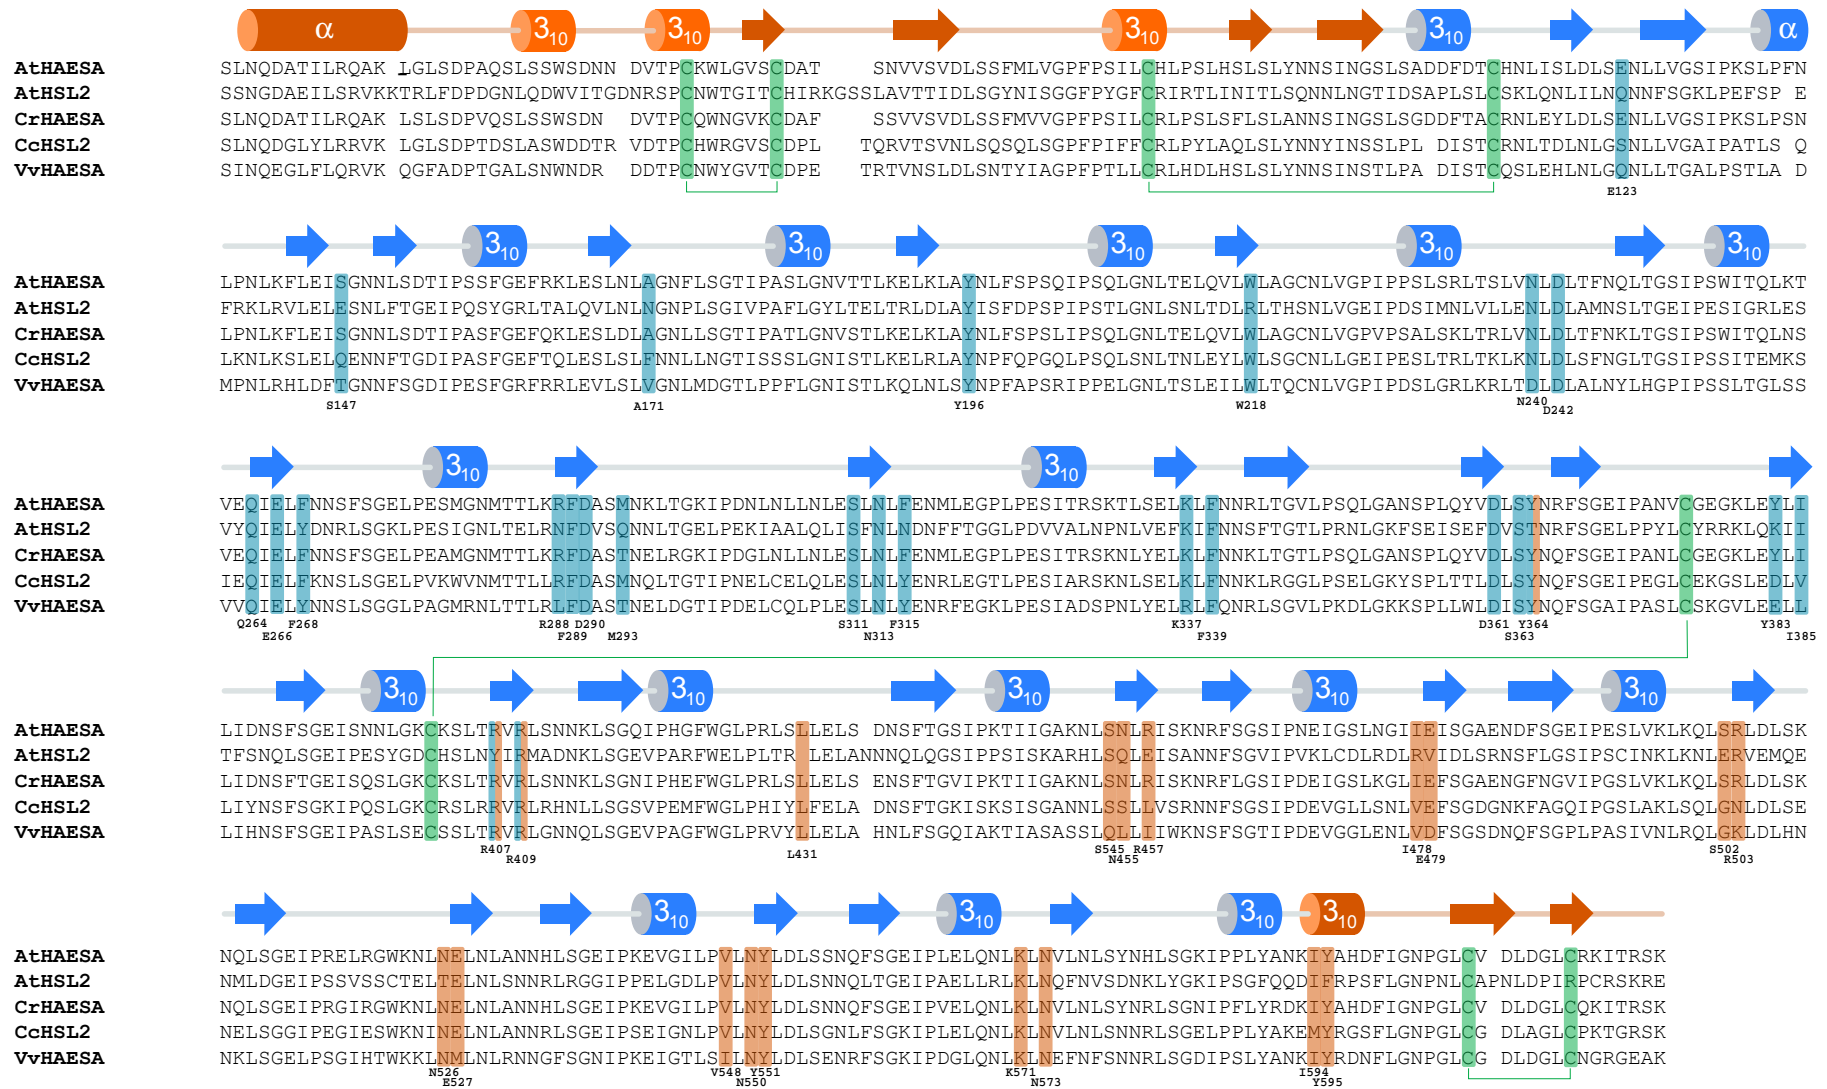

Supplement: supp [file elife-15075-supp-v1.zip]

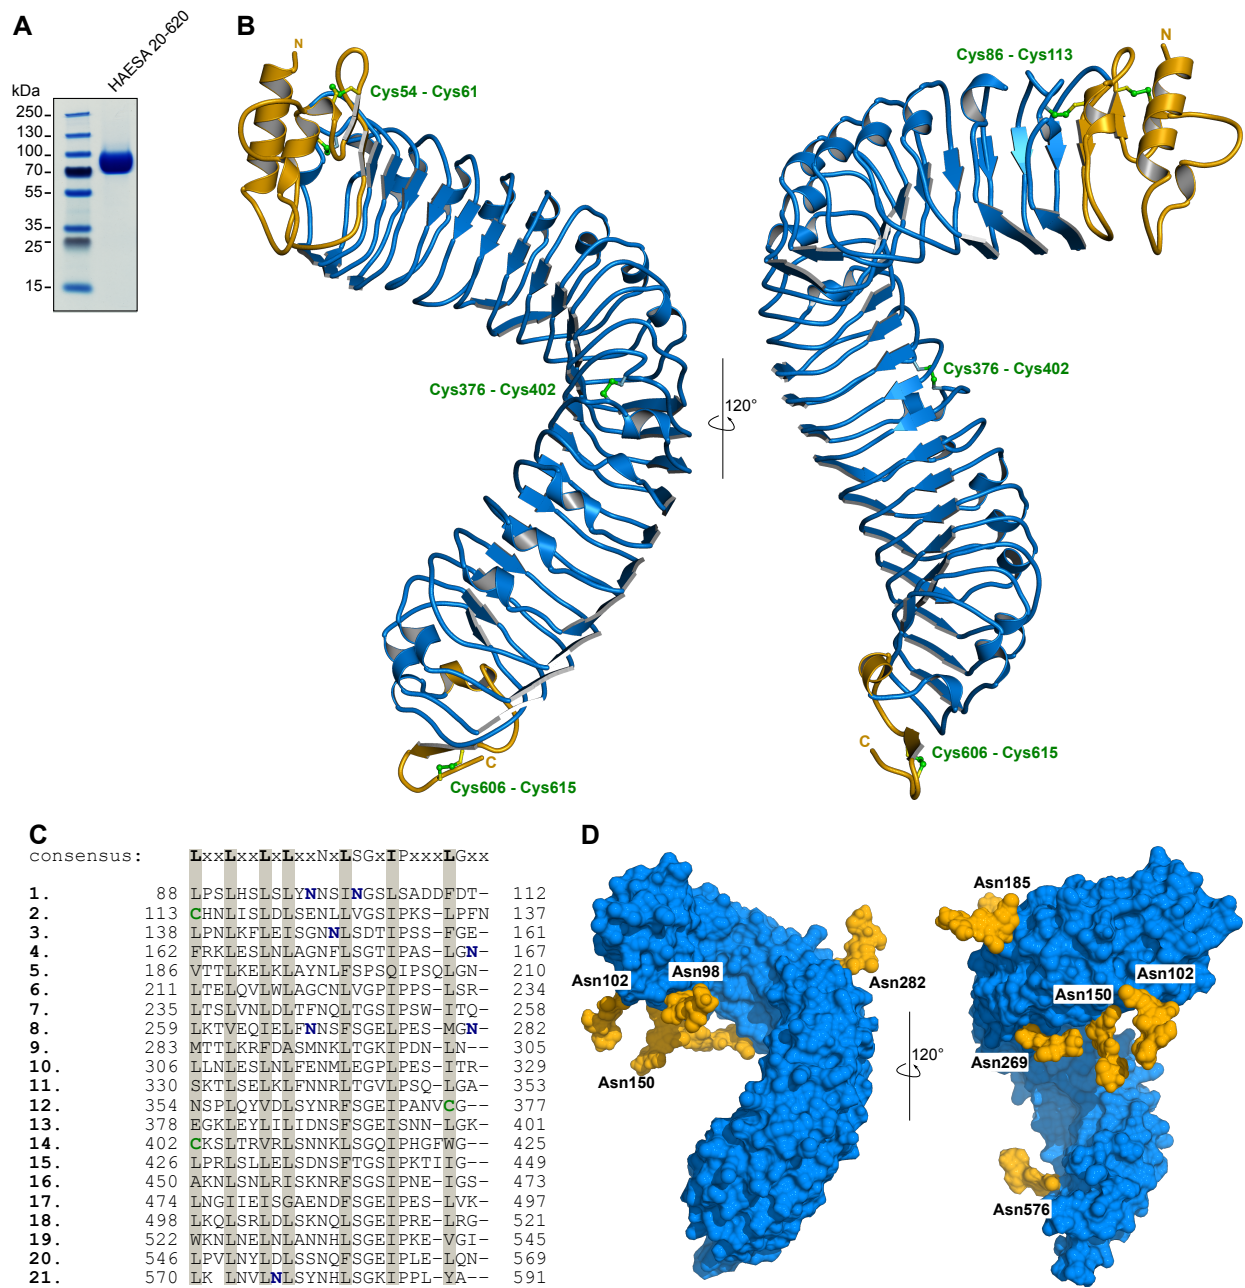

Supplement: supp [file elife-15075-supp-v1.zip]
